# Supplementary material for: A functionalized single-walled carbon nanotube-induced autophagic cell death in human lung cells through Akt–TSC2-mTOR signaling
Source: PubMed Central journal article supplement — Cell Death Dis. 2011 May 19;2(5):e159–. doi: 10.1038/cddis.2011.27 (PMC3122114; doi:10.1038/cddis.2011.27), 2011-05-19
Supplement: cddis201127x1.pdf [file cddis201127x1.pdf]

# S1

**A**

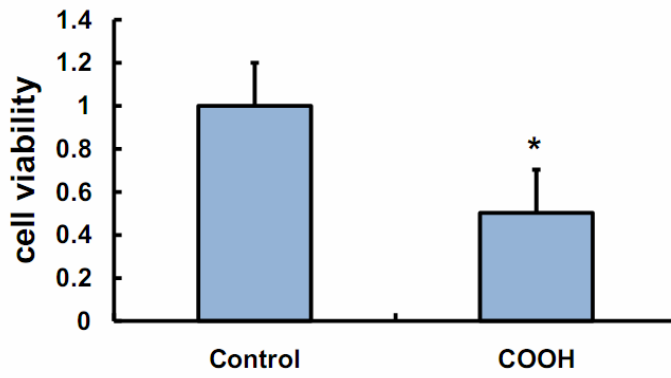

**B**

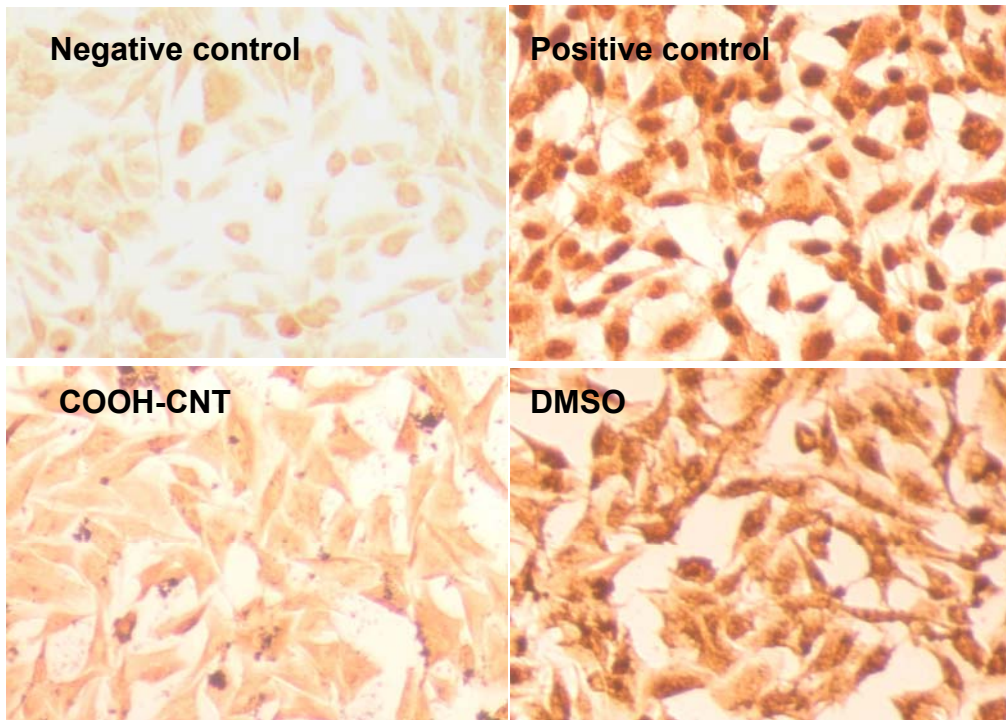

**C**

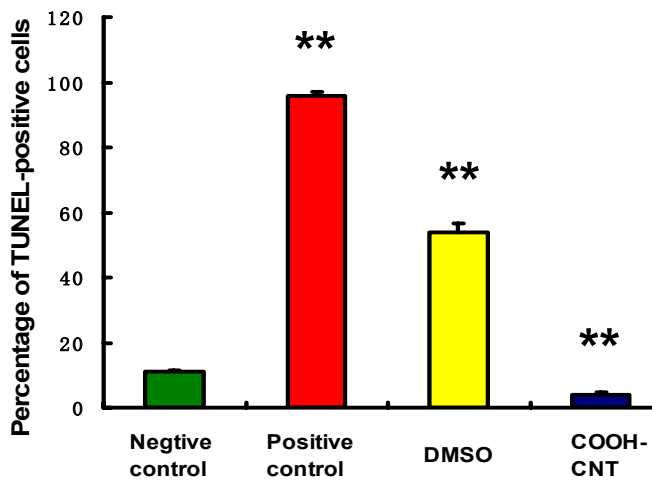

**D**

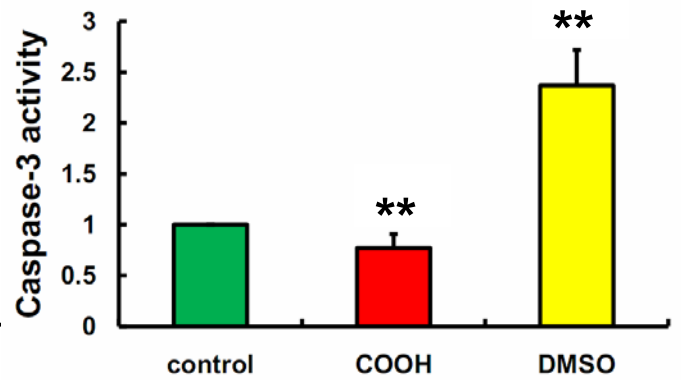

S1 COOH-CNT induces NCI-H1975 cell death, but not through apoptosis. (A) Cell viability of NCI-H1975 cells after control, COOH-CNT treatment. (B) Representative TUNEL images of NCI-H1975 cells after negative control, positive control, DMSO, COOH-CNT treatment. (C) Percentage of TUNEL-positive cells after negative control, positive control, DMSO, COOH-CNT treatment. (D) Caspase-3 activity in 1975 cells after control, COOH-CNT and DMSO treatment. \*  $P < 0.05$ , \*\*  $P < 0.01$  versus control.

S2

A

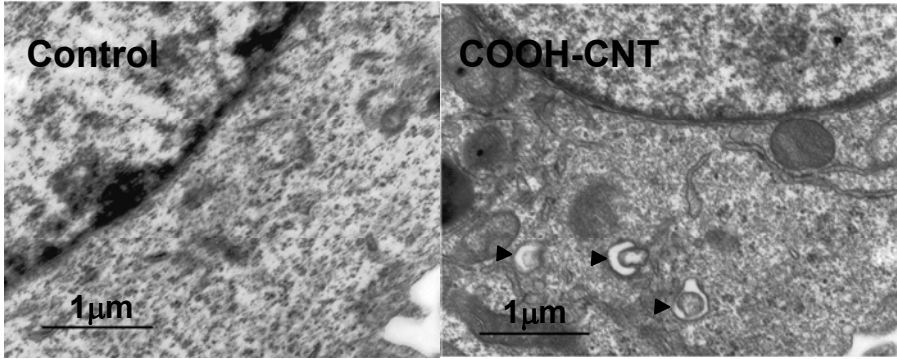

B

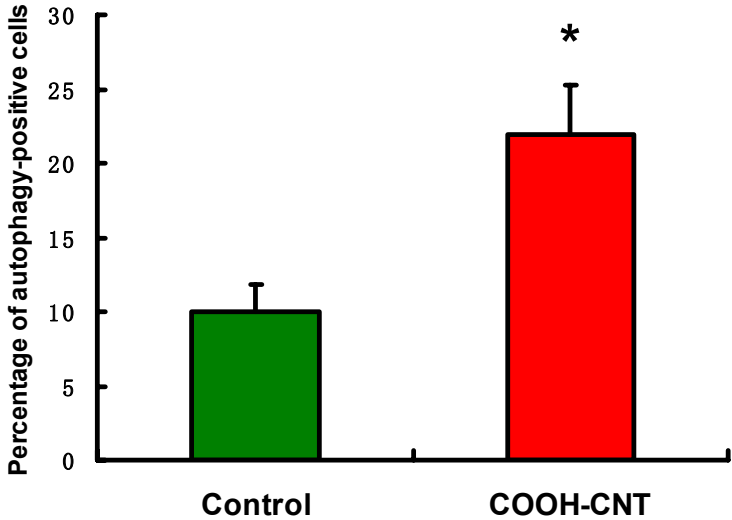

C

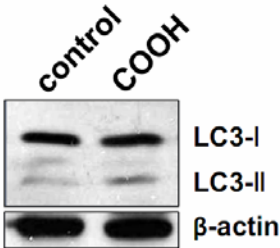

D

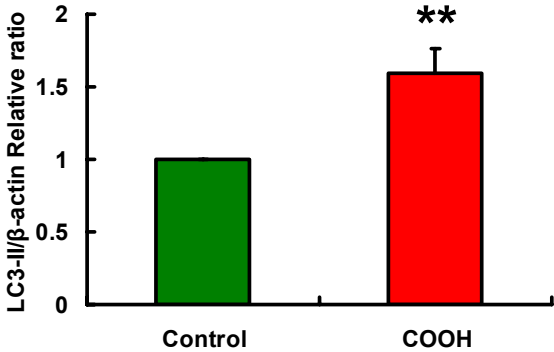

**F**

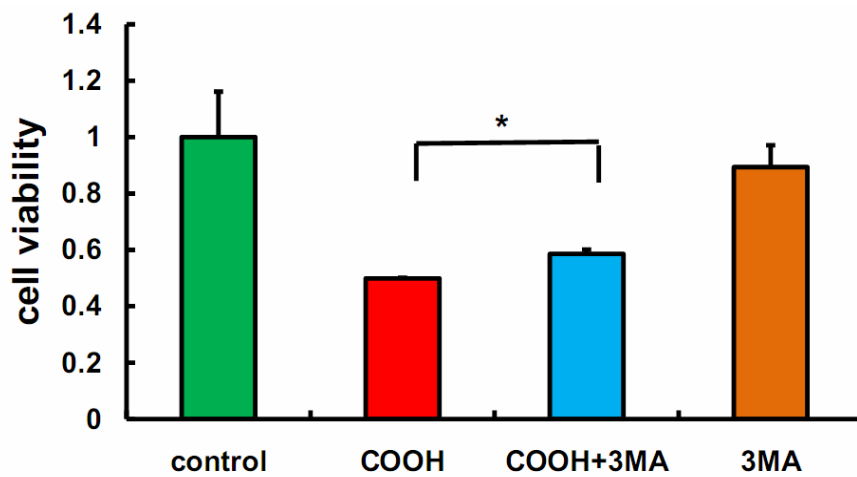

S2 COOH-CNT induces autophagic cell death in NCI-H1975 cells.(A) Electronic microscopy images of NCI-H1975 cells after control, COOH-CNT treatment for 24h. (B) Percentage of autophagy-positive cells after control, COOH-CNT treatment. (C) LC3 western blotting of NCI-H1975 cells after control, COOH-CNT treatment. (D) Relative ratio of LC3-II/ $\beta$ -actin in control, COOH-CNT treated NCI-H1975 cells. (E) Cell viability of NCI-H1975 cells after control, COOH-CNT, 3-MA plus COOH-CNT and 3-MA treatment. \* $P < 0.05$ , \*\*  $P < 0.01$ .
